# Supplementary material for: Rationales and uncertainties for aspirin use in COVID-19: a narrative review
Source: PubMed Central journal article supplement — Fam Med Community Health. 2021 Apr 20;9(2):e000741. doi: 10.1136/fmch-2020-000741 (PMC8061559; doi:10.1136/fmch-2020-000741), 2021-04-20
Supplement: fmch-2020-000741supp001.pdf [file fmch-2020-000741supp001.pdf]

**Supplemental document 1.****Aspirin review search strategy overview**

|                     |   |                                                                                                                 |
|---------------------|---|-----------------------------------------------------------------------------------------------------------------|
| <b>Question(s):</b> | 1 | What is the current understanding of COVID-19 pathophysiology and its relationship to thrombus formation?       |
|                     | 2 | What research is available regarding COVID-19 and aspirin use?                                                  |
|                     | 3 | What are the current guidelines or evidence supporting aspirin use for primary prevention of systemic diseases? |

|                                 |                                                                                                                                                                                                                                                                                                                                                                                                                                         |                |
|---------------------------------|-----------------------------------------------------------------------------------------------------------------------------------------------------------------------------------------------------------------------------------------------------------------------------------------------------------------------------------------------------------------------------------------------------------------------------------------|----------------|
| <b>Date of search:</b>          | 1/1/2016-1/1/2021                                                                                                                                                                                                                                                                                                                                                                                                                       |                |
| <b>PubMed Search Strategy:</b>  |                                                                                                                                                                                                                                                                                                                                                                                                                                         |                |
| <b>No.</b>                      | <b>Query results</b>                                                                                                                                                                                                                                                                                                                                                                                                                    | <b>Results</b> |
| #1                              | (COVID-19 or coronavirus disease 2019 or SARS-CoV-2[MeSH Major Topic]) AND (thombosis[Title] OR thromboembolism[Title] OR thromboembolic[Title] OR vascular endothelialitis[Title] OR endotheliopathy[Title] OR clot[Title] OR hypercoagulability[Title] OR coagulopathy[Title]) limit to (full text and journal article or meta-analysis or randomized control trial or review or systematic review and yr= "01/01/2016 -01/01/2020")  | 311            |
| #2                              | (aspirin or ASA or acetylsalicylic acid[MeSH Major Topic]) AND (coronavirus disease 2019[Title] OR COVID-19[Title] OR SARS-CoV-2[Title]) limit to (full text and journal article and yr= "01/01/2016 -01/01/2020")                                                                                                                                                                                                                      | 83             |
| #3                              | (aspirin or ASA or acetylsalicylic acid[MeSH Major Topic]) AND (prevention[Title] OR guideline[Title] OR consensus[Title]) limit to (full text and guideline or meta-analysis or systematic review or consensus development conference and yr= "01/01/2016 -01/01/2020")                                                                                                                                                                | 149            |
|                                 | Total                                                                                                                                                                                                                                                                                                                                                                                                                                   | 543            |
| <b>MEDLINE Search Strategy:</b> |                                                                                                                                                                                                                                                                                                                                                                                                                                         |                |
| <b>No.</b>                      | <b>Query results</b>                                                                                                                                                                                                                                                                                                                                                                                                                    | <b>Results</b> |
| #1                              | ((coronavirus disease 2019 or COVID-19 or SARS-CoV-2) and (thombosis or thromboembolism or thromboembolic or vascular endothelialitis or endotheliopathy or clot or hypercoagulability or coagulopathy)).mp. [mp=title, abstract, original title, name of substance word, subject heading word, floating sub-heading word, keyword heading word, organism supplementary concept word, protocol supplementary concept word, rare disease | 198            |

|                                                |                                                                                                                                                                                                                                                                                                                                                                                                                                                                                                       |                |
|------------------------------------------------|-------------------------------------------------------------------------------------------------------------------------------------------------------------------------------------------------------------------------------------------------------------------------------------------------------------------------------------------------------------------------------------------------------------------------------------------------------------------------------------------------------|----------------|
|                                                | supplementary concept word, unique identifier, synonyms] limit to (english language and full text and yr="2016 -2021")                                                                                                                                                                                                                                                                                                                                                                                |                |
| #2                                             | ((coronavirus disease 2019 or COVID-19 or SARS-CoV-2) and (aspirin or ASA or acetylsalicylic acid)).mp. [mp=title, abstract, original title, name of substance word, subject heading word, floating sub-heading word, keyword heading word, organism supplementary concept word, protocol supplementary concept word, rare disease supplementary concept word, unique identifier, synonyms] limit to (english language and full text and yr="2016 -2021")                                             | 21             |
| #3                                             | ((aspirin or ASA or acetylsalicylic acid) and (prevention or guidelines or consensus)).mp. [mp=title, abstract, original title, name of substance word, subject heading word, floating sub-heading word, keyword heading word, organism supplementary concept word, protocol supplementary concept word, rare disease supplementary concept word, unique identifier, synonyms] limit to (english language and full text and "review articles" and "core clinical journals (aim)" and yr="2016 -2021") | 20             |
|                                                | Total                                                                                                                                                                                                                                                                                                                                                                                                                                                                                                 | 239            |
| <b>Cochrane Review Library Search Strategy</b> |                                                                                                                                                                                                                                                                                                                                                                                                                                                                                                       |                |
| No.                                            | <b>Query results</b>                                                                                                                                                                                                                                                                                                                                                                                                                                                                                  | <b>Results</b> |
| #1                                             | (coronavirus disease 2019 or COVID-19 or SARS-CoV-2):kw AND (thombosis or thromboembolism or thromboembolic or vascular endothelialitis or endotheliopathy or clot or hypercoagulability or coagulopathy):kw                                                                                                                                                                                                                                                                                          | 15             |
| #2                                             | (coronavirus disease 2019 or COVID-19 or SARS-CoV-2):kw AND (aspirin or ASA or acetylsalicylic acid):kw                                                                                                                                                                                                                                                                                                                                                                                               | 0              |
| #3                                             | (aspirin or ASA or acetylsalicylic acid):ti,ab,kw AND (prevention or guidelines or consensus):kw limit to (Cochrane Reviews and Heart&Circulation and yr = 2016 -Current")                                                                                                                                                                                                                                                                                                                            | 12             |
|                                                | Total                                                                                                                                                                                                                                                                                                                                                                                                                                                                                                 | 27             |
|                                                |                                                                                                                                                                                                                                                                                                                                                                                                                                                                                                       |                |
|                                                | Cummulative total                                                                                                                                                                                                                                                                                                                                                                                                                                                                                     | 809            |
|                                                | Additional resources                                                                                                                                                                                                                                                                                                                                                                                                                                                                                  | 45             |
|                                                | Total                                                                                                                                                                                                                                                                                                                                                                                                                                                                                                 | 854            |

## Search strategy flow sheet

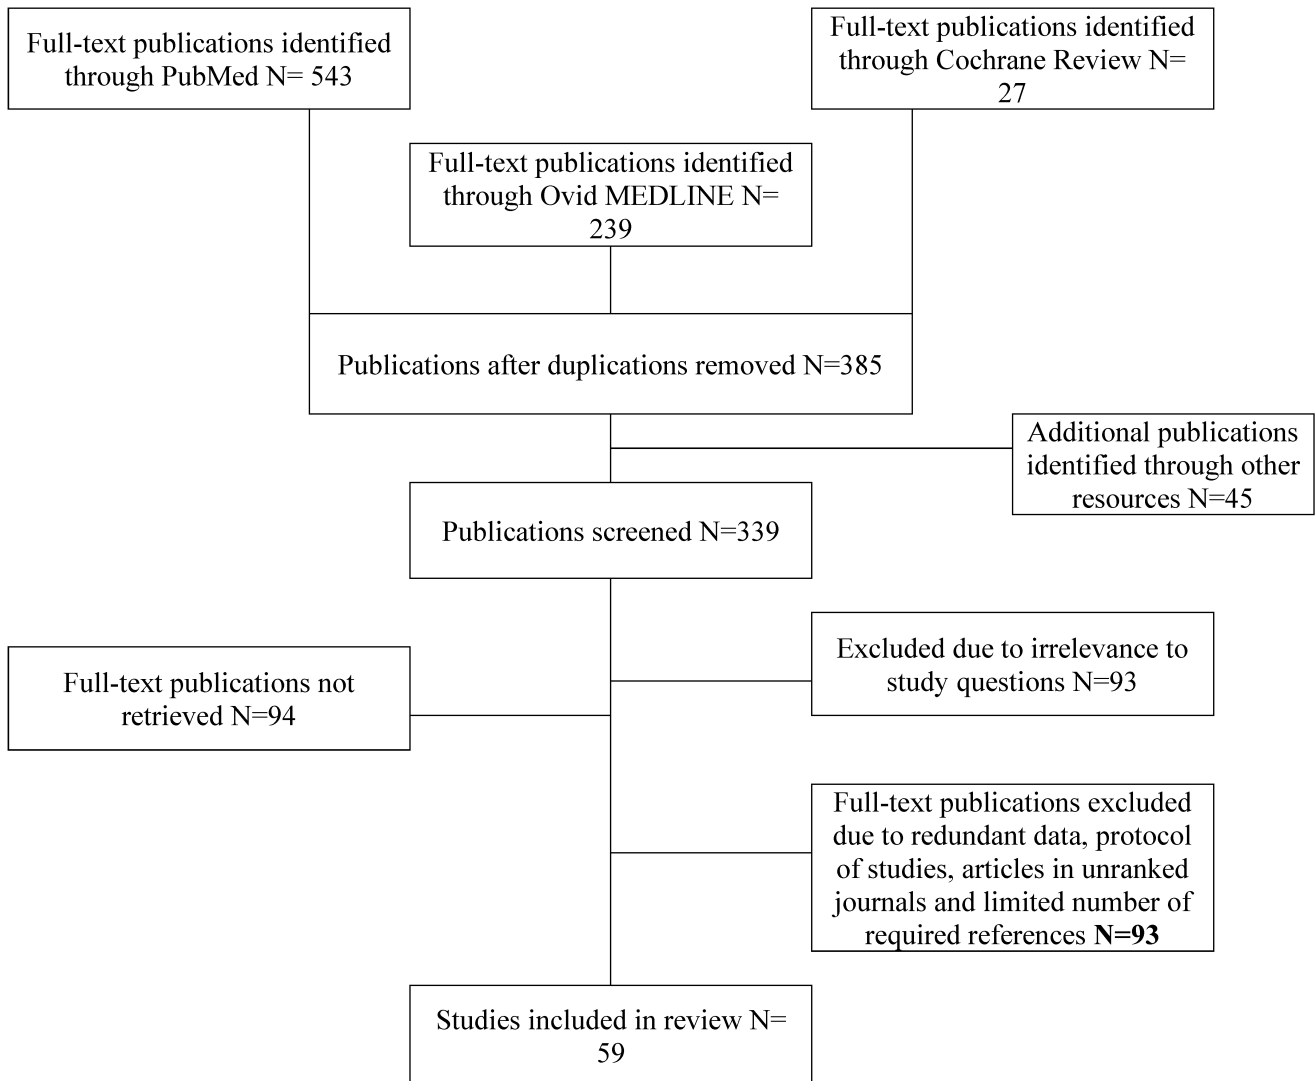

## Data extraction table for included studies

|   | Title                                                                                                                           | Type of article            | Journal                         | Obtained through                                                                                                | First author                         | Peer review ? | Publication date | Topic                                 | Key findings |
|---|---------------------------------------------------------------------------------------------------------------------------------|----------------------------|---------------------------------|-----------------------------------------------------------------------------------------------------------------|--------------------------------------|---------------|------------------|---------------------------------------|--------------|
| 1 | Coronavirus Disease 2019 (COVID-19) Treatment Guidelines. National Institutes of Health.                                        | Guidelines/Consensus       |                                 | <a href="https://www.covid19treatmentguidelines.nih.gov/">https://www.covid19treatmentguidelines.nih.gov/</a> . | COVID-19 Treatment Guidelines Panel. |               | 2020             | Treatment guideline                   |              |
| 2 | Effects of Aspirin on Endothelial Function and Hypertension.                                                                    | Review                     | Curr Hypertens Rep              | doi:10.1007/s11906-016-0688-8.                                                                                  | Dzeshka MS                           | Yes           | 2016             | Aspirin effects                       |              |
| 3 | Antiviral activity of aspirin against RNA viruses of the respiratory tract-an in vitro study.                                   | Experimental study         | Influenza Other Respir Viruses. | doi:10.1111/irv.12421.                                                                                          | Glatthaar-Saalmüller B               | Yes           | 2017             | Antiviral activity of aspirin         |              |
| 4 | COVID-19 as an Acute Inflammatory Disease.                                                                                      | Review                     | J Immunol                       | doi:10.4049/jimmunol.2000413.                                                                                   | Manjili RH                           | Yes           | 2020             | Pathogenesis                          |              |
| 5 | Coagulopathy and Antiphospholipid Antibodies in Patients with Covid-19.                                                         | Series of case reports     | N Engl J Med.                   | doi:10.1056/NEJMc2007575.                                                                                       | Zhang Y                              | Yes           | 2020             | Pathogenesis                          |              |
| 6 | An outbreak of severe Kawasaki-like disease at the Italian epicentre of the SARS-CoV-2 epidemic: an observational cohort study. | Observational cohort study | Lancet.                         | doi:10.1016/S0140-6736(20)31103-X.                                                                              | Verdoni L                            | Yes           | 2020             | Epidemiology of Kawasaki-like disease |              |
| 7 | The cytokine storm in COVID-19: An overview of the involvement of the chemokine/chemokine-receptor system.                      | Review                     | Cytokine Growth Factor Rev.     | doi:10.1016/j.cytogfr.2020.05.003.                                                                              | Coperchini F                         | Yes           | 2020             | Pathogenesis                          |              |
| 8 | COVID-19: consider cytokine storm syndromes and immunosuppression.                                                              | Correspondence             | Lancet.                         | doi:10.1016/S0140-6736(20)30628-0.                                                                              | Mehta P                              | Yes           | 2020             | Pathogenesis                          |              |

|    |                                                                                                                                                      |                      |                                    |                                                                                                                                                                               |                   |     |      |                     |  |
|----|------------------------------------------------------------------------------------------------------------------------------------------------------|----------------------|------------------------------------|-------------------------------------------------------------------------------------------------------------------------------------------------------------------------------|-------------------|-----|------|---------------------|--|
| 9  | COVACTA trial raises questions about tocilizumab's benefit in COVID-19.                                                                              | News                 | Lancet Rheumatol                   | doi:10.1016/S2665-9913(20)30313-1.                                                                                                                                            | Furlow B          |     | 2020 | Pathogenesis        |  |
| 10 | COVID-19: the vasculature unleashed.                                                                                                                 | Comment              | Nat Rev Immunol.                   | doi: 10.1038/s41577-020-0343-0.                                                                                                                                               | Teuwen LA         | Yes | 2020 | Pathogenesis        |  |
| 11 | Endothelial cell infection and endotheliitis in COVID-19.                                                                                            | Case reports         | Lancet.                            | doi:10.1016/S0140-6736(20)30937-5.                                                                                                                                            | Varga Z           | Yes | 2020 | Pathogenesis        |  |
| 12 | Endothelial Dysfunction and Thrombosis in Patients With COVID-19-Brief Report.                                                                       | Case reports         | Arteriosclerosis Thromb Vasc Biol. | doi:10.1161/ATVBAHA.120.314860.                                                                                                                                               | Nagashima S       | Yes | 2020 | Pathogenesis        |  |
| 13 | Aspirin with or without statin in the treatment of endotheliitis, thrombosis, and ischemia in coronavirus disease.                                   | Case series          | Rev Soc Bras Med Trop.             | doi: 10.1590/0037-8682-0472-2020.                                                                                                                                             | Florêncio FKZ     | Yes | 2020 | Aspirin in COVID-19 |  |
| 14 | ESC Guidance for the Diagnosis and Management of CV Disease during the COVID-19 Pandemic                                                             | Guidance             |                                    | <a href="https://www.escardio.org/Education/COVID-19-and-Cardiology/ESCCOVID-19-Guidance">https://www.escardio.org/Education/COVID-19-and-Cardiology/ESCCOVID-19-Guidance</a> | ESC               |     | 2020 | Prevention          |  |
| 15 | Aspirin Use for the Primary Prevention of Cardiovascular Disease and Colorectal Cancer: U.S. Preventive Services Task Force Recommendation Statement | Guidelines/Consensus | <i>Ann Intern Med</i>              | doi:10.7326/M16-0577                                                                                                                                                          | Bibbins-Domingo K | Yes | 2016 | CVD Prevention      |  |

|    |                                                                                                                                                                                                                                                                                                                                                                                                                                       |                      |                         |                                           |                               |     |      |                |  |
|----|---------------------------------------------------------------------------------------------------------------------------------------------------------------------------------------------------------------------------------------------------------------------------------------------------------------------------------------------------------------------------------------------------------------------------------------|----------------------|-------------------------|-------------------------------------------|-------------------------------|-----|------|----------------|--|
| 16 | 2016 European Guidelines on cardiovascular disease prevention in clinical practice: The Sixth Joint Task Force of the European Society of Cardiology and Other Societies on Cardiovascular Disease Prevention in Clinical Practice (constituted by representatives of 10 societies and by invited experts) Developed with the special contribution of the European Association for Cardiovascular Prevention & Rehabilitation (EACPR) | Guidelines/Consensus | <i>Atherosclerosis</i>  | doi:10.1016/j.atherosclerosis.2016.05.037 | Authors/Task Force Members    | Yes | 2016 | CVD Prevention |  |
| 17 | Standards of Medical Care in Diabetes-2020 Abridged for Primary Care Providers                                                                                                                                                                                                                                                                                                                                                        | Guidelines/Consensus | <i>Clin Diabetes</i>    | doi:10.2337/cd20-as01                     | American Diabetes Association | Yes | 2020 | CVD Prevention |  |
| 18 | Canadian Stroke Best Practice Recommendations, seventh edition: acetylsalicylic acid for prevention of vascular events                                                                                                                                                                                                                                                                                                                | Guidelines/Consensus | <i>CMAJ</i>             | doi:10.1503/cmaj.191599                   | Wein T                        | Yes | 2020 | CVD Prevention |  |
| 19 | 2019 ACC/AHA Guideline on the Primary Prevention of Cardiovascular Disease: A Report of the American College of Cardiology/American Heart Association Task Force on Clinical Practice Guidelines [published correction appears in <i>Circulation</i> ]                                                                                                                                                                                | Guidelines/Consensus | <i>Circulation</i>      | doi:10.1161/CIR.0000000000000678          | Arnett DK                     | Yes | 2019 | CVD Prevention |  |
| 20 | Pathological inflammation in patients with COVID-19: a key role for monocytes and macrophages.                                                                                                                                                                                                                                                                                                                                        | Review               | <i>Nat Rev Immunol.</i> | doi: 10.1038/s41577-020-0331-4.           | Merad M                       | Yes | 2020 | Pathogenesis   |  |

|    |                                                                                                                                                       |                            |                                        |                                     |             |     |      |                                       |                                                                                                                                                                                                                                                                                                                                                       |
|----|-------------------------------------------------------------------------------------------------------------------------------------------------------|----------------------------|----------------------------------------|-------------------------------------|-------------|-----|------|---------------------------------------|-------------------------------------------------------------------------------------------------------------------------------------------------------------------------------------------------------------------------------------------------------------------------------------------------------------------------------------------------------|
| 21 | Venous and arterial thromboembolic complications in COVID-19 patients admitted to an academic hospital in Milan, Italy.                               | Retrospective cohort study | Thromb Res.                            | doi:10.1016/j.thromres.2020.04.024. | Lodigiani C | Yes | 2020 | Epidemiology of COVID-9 complications |                                                                                                                                                                                                                                                                                                                                                       |
| 22 | Thrombosis in Hospitalized Patients With COVID-19 in a New York City Health System.                                                                   | Letter                     | JAMA                                   | doi: 10.1001/jama.2020.13372.       | Bilaloglu S | Yes | 2020 | Epidemiology of COVID-9 complications | In a health system in New York, where most patients were treated with low dose of anticoagulation, the incidence of arterial and venous thrombosis in 829 ICU patients were 18.6% and 13.6% respectively, and among 2505 non-ICU patients, the incidence of arterial and venous thrombosis were 8.4% and 3.6% respectively                            |
| 23 | Venous thrombosis epidemiology, pathophysiology, and anticoagulant therapies and trials in severe acute respiratory syndrome coronavirus 2 infection. | Review                     | J. Vasc. Surg. Venous Lymphat. Disord. | doi: 10.1016/j.jvsv.2020.08.030.    | Obi AT      | Yes | 2020 | Epidemiology of COVID-9 complications | 21% to 69% incidence rate of venous thromboembolism (VTE) in critically ill patients with COVID-19. In addition to deep venous thrombosis (DVT) and acute pulmonary embolism (APE), patients developed circuit clotting of continuous renal replacement therapy and ECMO. They also described 'breakthrough VTE' where VTE develops despite receiving |

|    |                                                                                                          |                            |                   |                                      |              |     |      |                                       |                                                                                                                                                                                                                                                                                                     |
|----|----------------------------------------------------------------------------------------------------------|----------------------------|-------------------|--------------------------------------|--------------|-----|------|---------------------------------------|-----------------------------------------------------------------------------------------------------------------------------------------------------------------------------------------------------------------------------------------------------------------------------------------------------|
|    |                                                                                                          |                            |                   |                                      |              |     |      |                                       | prophylactic or therapeutic doses of anticoagulation                                                                                                                                                                                                                                                |
| 24 | Incidence of venous thromboembolism in hospitalized patients with COVID-19.                              | Single-center cohort study | J Thromb Haemost. | doi: 10.1111/jth.14888.              | Middeldorp S | Yes | 2020 | Epidemiology of COVID-9 complications | A cohort study of 198 hospitalized patients with COVID-19 in Amsterdam, where all patients had received prophylactic anticoagulation, the cumulative risk for developing VTE at 7, 14 and 21 days was 16%, 33%, and 42% respectively, with a higher incidence in ICU patients than non-ICU patients |
| 25 | Incidence of thrombotic complications in critically ill ICU patients with COVID-19.                      | Descriptive study          | Thromb Res.       | doi: 10.1016/j.thromres.2020.04.013. | Klok FA      | Yes | 2020 | Epidemiology of COVID-9 complications | A Dutch study reported the frequency of arterial thrombosis (ischemic stroke, myocardial infarction or systemic thromboembolism) as 3.7% in 184 ICU patients                                                                                                                                        |
| 26 | Acute pulmonary embolism in non-hospitalized COVID-19 patients referred to CTPA by emergency department. | Retrospective study        | Eur Radiol.       | doi: 10.1007/s00330-020-06977-5.     | Gervaise A   | Yes | 2020 | Epidemiology of COVID-9 complications | 18% of non-hospitalized patients with COVID-19 who were evaluated by computed tomography pulmonary angiography (CTPA) in the emergency department were found to have APE                                                                                                                            |



|    |                                                                                                                                           |                 |                       |                                 |              |     |      |                                       |  |
|----|-------------------------------------------------------------------------------------------------------------------------------------------|-----------------|-----------------------|---------------------------------|--------------|-----|------|---------------------------------------|--|
| 27 | Multiple Thrombotic Events in a 67-Year-Old Man 2 Weeks After Testing Positive for SARS-CoV-2: A Case Report.                             | Case study      | Am J Case Rep.        | doi:10.12659/AJCR.925786.       | Shawkat A    | Yes | 2020 | Epidemiology of COVID-9 complications |  |
| 28 | The unique characteristics of COVID-19 coagulopathy.                                                                                      | Review          | Crit Care.            | doi:10.1186/s13054-020-03077-0. | Iba T        | Yes | 2020 | Pathogenesis                          |  |
| 29 | Emerging evidence of a COVID-19 thrombotic syndrome has treatment implications.                                                           | Review          | Nat Rev Rheumatol     | doi:10.1038/s41584-020-0474-5.  | Merrill JT   | Yes | 2020 | Pathogenesis                          |  |
| 30 | Aspirin Bioactivity for Prevention of Cardiovascular Injury in COVID-19.                                                                  | Opinion article | Front Cardiovasc Med. | doi: 10.3389/fcvm.2020.562708.  | Diaz T       | Yes | 2020 | Pathogenesis                          |  |
| 31 | New insights into the mechanisms of action of aspirin and its use in the prevention and treatment of arterial and venous thromboembolism. | Review          | Ther Clin Risk Manag. | doi:10.2147/TCRM.S92222.        | Mekaj YH     | Yes | 2015 | Pathogenesis                          |  |
| 32 | COVID-19 pneumonia: different respiratory treatments for different phenotypes?                                                            | Editorial       | Intensive Care Med    | doi:10.1007/s00134-020-06033-2. | Gattinoni L  | Yes | 2020 | Pathogenesis                          |  |
| 33 | Pathways in the Pathophysiology of Coronavirus 19 Lung Disease Accessible to Prevention and Treatment.                                    | Review          | Front Physiol.        | doi:10.3389/fphys.2020.00872.   | Eisenhut M   | Yes | 2020 | Pathogenesis                          |  |
| 34 | Pulmonary Vascular Endothelialitis, Thrombosis, and Angiogenesis in Covid-19.                                                             | Case reports    | N Engl J Med.         | doi: 10.1056/NEJMoa2015432.     | Ackerman n M | Yes | 2020 | Pathogenesis                          |  |
| 35 | Aspirin as a potential treatment in sepsis or acute respiratory distress syndrome.                                                        | Review          | Crit Care.            | doi:10.1186/s13054-015-1091-6.  | Toner P      | Yes | 2015 | Aspirin and sepsis                    |  |

|    |                                                                                                                                                        |                                   |                              |                                        |              |     |      |                                  |                                                                                                                                                                                                                               |
|----|--------------------------------------------------------------------------------------------------------------------------------------------------------|-----------------------------------|------------------------------|----------------------------------------|--------------|-----|------|----------------------------------|-------------------------------------------------------------------------------------------------------------------------------------------------------------------------------------------------------------------------------|
| 36 | Antiplatelet Therapy After Percutaneous Coronary Intervention in Patients With COVID-19: Implications From Clinical Features to Pathologic Findings.   | Persprective                      | Circulation .                | doi:10.1161/CIRCULATIONAHA.120.046988. | Zhou X       | Yes | 2020 | Aspirin and ARDS and its sequale |                                                                                                                                                                                                                               |
| 37 | Kawasaki-like diseases and thrombotic coagulopathy in COVID-19: delayed over-activation of the STING pathway?                                          | Review                            | Emerg Microbes Infect.       | doi:10.1080/22221751.2020.1785336.     | Berthelot JM | Yes | 2020 | Pathogenesis                     |                                                                                                                                                                                                                               |
| 38 | TMEM173 Drives Lethal Coagulation in Sepsis.                                                                                                           | Experiments                       | Cell Host Microbe.           | doi:10.1016/j.chom.2020.02.004.        | Zhang H      | Yes | 2020 | Pathogenesis                     |                                                                                                                                                                                                                               |
| 39 | Fibrinolytic abnormalities in acute respiratory distress syndrome (ARDS) and versatility of thrombolytic drugs to treat COVID-19.                      | Review                            | J Thromb Haemost.            | doi:10.1111/jth.14872.                 | Whyte CS     | Yes | 2020 | Pathogenesis                     |                                                                                                                                                                                                                               |
| 40 | Does Ibuprofen Worsen COVID-19?                                                                                                                        | Editorial                         | Drug Saf.                    | doi:10.1007/s40264-020-00953-0.        | Moore N      | Yes | 2020 | Aspirin safety                   |                                                                                                                                                                                                                               |
| 41 | Acute Respiratory Infection and Use of Nonsteroidal Anti-Inflammatory Drugs on Risk of Acute Myocardial Infarction: A Nationwide Case-Crossover Study. | A Nationwide Case-Crossover Study | J Infect Dis.                | doi:10.1093/infdis/jiw603.             | Wen YC       | Yes | 2017 | Aspirin safety                   |                                                                                                                                                                                                                               |
| 42 | Risk of stroke associated with use of nonsteroidal anti-inflammatory drugs during acute respiratory infection episode.                                 | A population-based study          | Pharmacoe pidemiol Drug Saf. | doi:10.1002/pds.4428.                  | Wen YC       | Yes | 2018 | Aspirin safety                   | population-based cohort study in Denmark involved 9236 patients with confirmed COVID-19, among them NSAID users were 248 (2.7%). They found that use of NSAIDs was not associated with 30-day mortality, hospitalization, ICU |

|    |                                                                                                                                                                                                |                           |                          |                                               |            |     |      |                |                                                                                                                     |
|----|------------------------------------------------------------------------------------------------------------------------------------------------------------------------------------------------|---------------------------|--------------------------|-----------------------------------------------|------------|-----|------|----------------|---------------------------------------------------------------------------------------------------------------------|
|    |                                                                                                                                                                                                |                           |                          |                                               |            |     |      |                | admission, mechanical ventilation, or renal replacement therapy in Danish patients who tested positive for COVID-19 |
| 43 | Risks Related to the Use of Non-Steroidal Anti-Inflammatory Drugs in Community-Acquired Pneumonia in Adult and Pediatric Patients.                                                             | Two cohort studies        | J Clin Med.              | doi:10.3390/jcm8060786.                       | Voiriot G  | Yes | 2019 | Aspirin safety |                                                                                                                     |
| 44 | Adverse outcomes and mortality in users of non-steroidal anti-inflammatory drugs who tested positive for SARS-CoV-2: A Danish nationwide cohort study.                                         | Population cohort study   | PLoS Med.                | doi:10.1371/journal.pmed.1003308.             | Lund LC    | Yes | 2020 | Aspirin safety |                                                                                                                     |
| 45 | Mortality and pre-hospitalization use of low-dose aspirin in COVID-19 patients with coronary artery disease.                                                                                   | Retrospective cohort      | J Cell Mol Med.          | doi: 10.1111/jcmm.16198. Epub ahead of print. | Yuan S     | Yes | 2020 | Aspirin        |                                                                                                                     |
| 46 | Clinical Effectiveness and Safety of Aspirin for Venous Thromboembolism Prophylaxis After Total Hip and Knee Replacement: A Systematic Review and Meta-analysis of Randomized Clinical Trials. | A nationwide cohort study | JAMA Intern Med.         | doi:10.1001/jamainternmed.2019.6108.          | Matharu GS | Yes | 2020 | Aspirin        |                                                                                                                     |
| 47 | Lessons Learned: Using the Caprini Risk Assessment Model to Provide Safe and Efficacious Thromboprophylaxis Following Hip and Knee Arthroplasty.                                               | Review                    | Clin Appl Thromb Hemost. | doi: 10.1177/1076029620961450.                | Krauss ES  | Yes | 2020 | Aspirin        |                                                                                                                     |

|    |                                                                                                                                                            |                                       |                   |                                   |          |     |      |                          |                                                                                                                                                                                                                                                                |
|----|------------------------------------------------------------------------------------------------------------------------------------------------------------|---------------------------------------|-------------------|-----------------------------------|----------|-----|------|--------------------------|----------------------------------------------------------------------------------------------------------------------------------------------------------------------------------------------------------------------------------------------------------------|
| 48 | Association Between Prior Aspirin Use and Acute Respiratory Distress Syndrome Incidence in At-Risk Patients: A Systematic Review and Meta-Analysis.        | A Systematic Review and Meta-Analysis | Front Pharmacol.  | doi:10.3389/fphar.2020.00738.     | Liang H  | Yes | 2020 | Aspirin                  |                                                                                                                                                                                                                                                                |
| 49 | The preventive effect of antiplatelet therapy in acute respiratory distress syndrome: a meta-analysis.                                                     | A meta-analysis                       | Crit Care.        | doi:10.1186/s13054-018-1988-y.    | Wang Y   | Yes | 2018 | Antiplatelet             |                                                                                                                                                                                                                                                                |
| 50 | Enhanced platelet inhibition treatment improves hypoxemia in patients with severe Covid-19 and hypercoagulability. A case control, proof of concept study. | Clinical trial                        | Pharmacol Res.    | doi:10.1016/j.phrs.2020.104950.   | Viecca M | Yes | 2020 | Antiplatelet in ARDS     |                                                                                                                                                                                                                                                                |
| 51 | Potential therapeutic effects of dipyridamole in the severely ill patients with COVID-19.                                                                  | Cohort study                          | Acta Pharm Sin B. | doi:10.1016/j.apsb.2020.04.008.   | Liu X    | Yes | 2020 | Dipyridamole in COVID-19 |                                                                                                                                                                                                                                                                |
| 52 | New (re)purpose for an old drug: purinergic modulation may extinguish the COVID-19 thromboinflammatory firestorm.                                          | Perspective                           | JCI Insight.      | doi:10.1172/jci.insight.140971.   | Kanthi Y | Yes | 2020 | Aspirin                  |                                                                                                                                                                                                                                                                |
| 53 | Aspirin use is associated with decreased mechanical ventilation, ICU admission, and in-hospital mortality in hospitalized patients with COVID-19.          | Retrospective cohort                  | Anesth. Analg.    | doi:10.1213/ANE.0000000000005292. | Chow JH  | Yes | 2020 | Aspirin in COVID-19      | The results of a multi-center cohort study of 412 COVID-19 patients in the USA were released that support the potential adjunctive therapeutic role of aspirin in COVID-19. The authors found that after adjustment for confounding variables, aspirin use was |

|    |                                                                                                                                                     |             |                            |                                    |               |     |      |                                        |                                                                                                                                                                                                                                                         |
|----|-----------------------------------------------------------------------------------------------------------------------------------------------------|-------------|----------------------------|------------------------------------|---------------|-----|------|----------------------------------------|---------------------------------------------------------------------------------------------------------------------------------------------------------------------------------------------------------------------------------------------------------|
|    |                                                                                                                                                     |             |                            |                                    |               |     |      |                                        | independently associated with a lower risk of mechanical ventilation (adjusted HR 0.56, 95% CI 0.37-0.85, p=0.007), ICU admission (adjusted HR 0.57, 95% CI 0.38-0.85, p=0.005), and in-hospital mortality (adjusted HR 0.53, 95% CI 0.31-0.90, p=0.02) |
| 54 | Kawasaki disease in siblings and a review of drug treatment.                                                                                        | Case report | Drugs Context.             | doi:10.7573/dic.2020-4-1.          | Loo SK        | Yes | 2020 | Aspirin in Kawasaki disease            |                                                                                                                                                                                                                                                         |
| 55 | Low-dose aspirin use for the prevention of morbidity and mortality from preeclampsia: U.S. Preventive Services Task Force recommendation statement. | Guideline   | Ann Intern Med.            | doi:10.7326/M14-1884.              | LeFevre ML    | Yes | 2014 | Prevention of preeclampsia             |                                                                                                                                                                                                                                                         |
| 56 | Gestational Hypertension and Preeclampsia.                                                                                                          | Guideline   | Obstet Gynecol.            | doi:10.1097/AOG.00000000000003018. | ACOG          | Yes | 2019 | Prevention of preeclampsia             |                                                                                                                                                                                                                                                         |
| 57 | Why we should not stop giving aspirin to pregnant women during the COVID-19 pandemic.                                                               | Comment     | Ultrasound Obstet Gynecol. | doi:10.1002/uog.22049.             | Kwiatkowski S | Yes | 2020 | Prevention of preeclampsia in COVID-19 |                                                                                                                                                                                                                                                         |
| 58 | Should we stop aspirin prophylaxis in pregnant women diagnosed with COVID-19?                                                                       | Comment     | Ultrasound Obstet Gynecol. | doi:10.1002/uog.22063.             | Gavillet M    | Yes | 2020 | Prevention of preeclampsia in COVID-19 |                                                                                                                                                                                                                                                         |

|    |                                                                                                 |        |       |                                  |            |     |      |                            |  |
|----|-------------------------------------------------------------------------------------------------|--------|-------|----------------------------------|------------|-----|------|----------------------------|--|
| 59 | Is Acetylsalicylic Acid a Safe and Potentially Useful Choice for Adult Patients with COVID-19?. | Review | Drugs | doi: 10.1007/s40265-020-01365-1. | Bianconi V | Yes | 2020 | Aspirin safety in COVID-19 |  |
|----|-------------------------------------------------------------------------------------------------|--------|-------|----------------------------------|------------|-----|------|----------------------------|--|

## Grey Literature Collection

| No. | Title                                                                                                                                                              | Type of article    | Organization/Journal/Clinical Trial Registries | Obtained through                                                                                                                                                              | First author                         | Peer review? | Publication date | Topic          |
|-----|--------------------------------------------------------------------------------------------------------------------------------------------------------------------|--------------------|------------------------------------------------|-------------------------------------------------------------------------------------------------------------------------------------------------------------------------------|--------------------------------------|--------------|------------------|----------------|
| 1   | Coronavirus Disease 2019 (COVID-19) Treatment Guidelines. National Institutes of Health.                                                                           | Guideline          | National Institutes of Health                  | <a href="https://www.covid19treatmentguidelines.nih.gov/">https://www.covid19treatmentguidelines.nih.gov/</a> .                                                               | COVID-19 Treatment Guidelines Panel. |              | 2020             | Prevention     |
| 14  | ESC Guidance for the Diagnosis and Management of CV Disease during the COVID-19 Pandemic                                                                           | Guidance           | European Society of Cardiology                 | <a href="https://www.escardio.org/Education/COVID-19-and-Cardiology/ESCCOVID-19-Guidance">https://www.escardio.org/Education/COVID-19-and-Cardiology/ESCCOVID-19-Guidance</a> | ESC                                  |              | 2020             | CVD Prevention |
| 9   | COVACTA trial raises questions about tocilizumab's benefit in COVID-19.                                                                                            | News               | Lancet Rheumatol.                              | doi:10.1016/S2665-9913(20)30313-1.                                                                                                                                            | Furlow B                             |              | 2020             | Pathogenesis   |
|     | Study of Immune Modulatory Drugs and Other Treatments in COVID-19 Patients: Sarilumab, Azithromycin, Hydroxychloroquine Trial - CORIMUNO-19 - VIRO (CORIMUNO-VIRO) | Trial registration | NCT04341870                                    |                                                                                                                                                                               |                                      |              |                  |                |

**14 studies on clinical trials website, including ten randomized trials**

|    |                                                                                                                                                            |  |             |
|----|------------------------------------------------------------------------------------------------------------------------------------------------------------|--|-------------|
| 1  | Aggrenox To Treat Acute Covid-19 (ATTAC-19)                                                                                                                |  | NCT04410328 |
| 2  | Coronavirus Response - Active Support for Hospitalised Covid-19 Patients (CRASH-19)                                                                        |  | NCT04343001 |
| 3  | COVID-19 Positive Outpatient Thrombosis Prevention in Adults Aged 40-80                                                                                    |  | NCT04498273 |
| 4  | Hemostasis in COVID-19: an Adaptive Clinical Trial                                                                                                         |  | NCT04466670 |
| 5  | The LEAD COVID-19 Trial: Low-risk, Early Aspirin and Vitamin D to Reduce COVID-19 Hospitalizations (LEAD COVID-19)                                         |  | NCT04363840 |
| 6  | Ivermectin, Aspirin, Dexamethasone and Enoxaparin as Treatment of Covid 19 (IDEA)                                                                          |  | NCT04425863 |
| 7  | Protective Effect of Aspirin on COVID-19 Patients (PEAC)                                                                                                   |  | NCT04365309 |
| 8  | Anti-Coronavirus Therapies to Prevent Progression of Coronavirus Disease 2019 (COVID-19) Trial (ACTCOVID19)                                                |  | NCT04324463 |
| 9  | Preventing Cardiac Complication of COVID-19 Disease With Early Acute Coronary Syndrome Therapy: A Randomised Controlled Trial. (C-19-ACS)                  |  | NCT04333407 |
| 10 | Prevention and Treatment for COVID -19 (Severe Acute Respiratory Syndrome Coronavirus 2 SARS-CoV-2) Associated Severe Pneumonia in the Gambia (PaTS-COVID) |  | NCT04703608 |
| 11 | Australasian COVID-19 Trial (ASCOT) ADaptive Platform Trial (ASCOT ADAPT)                                                                                  |  | NCT04483960 |
| 12 | Randomised Evaluation of COVID-19 Therapy (RECOVERY)                                                                                                       |  | NCT04381936 |
| 13 | Randomized, Embedded, Multifactorial Adaptive Platform Trial for Community- Acquired Pneumonia (REMAP-CAP)                                                 |  | NCT02735707 |
| 14 | Evolution of COVID-19 in Anticoagulated or Antiaggregated Patients (CORONA Study) (CORONA)                                                                 |  | NCT04518735 |
